# Supplementary material
Source: publisher site journal article supplement (https://www.dovepress.com/get_supplementary_file.php?f=275228.docx)

**Supplementary materials**

Table S1 Main active ingredients and targets of Polygonum cuspidatum.

| Mol Name | Targets |
| --- | --- |
| 6,8-Dihydroxy-7-methoxyxanthone | PTGS1,PTGS2,ADRB2,MAPK14,GSK3B,CHEK1,PKIA |
| Physovenine | NOS2,PTGS1,CHRM3,CHRM1,ESR1,AR,SCN5A,PTGS2,RXRA,OPRD1，ACHE,SLC6A2,ADRA1A,CHRM2,ADRA2B，  ADRA1B,SLC6A3,ADRB2,CHRNA2,SLC6A4,OPRM1,ESR2,  GABRA1,GSK3B,PRSS1,CCNA2,GRIA2AR,SCN5A,OPRD1,  OPRM1 |
| Picralinal | PTGS1,PTGS2,NCOA2,AKR1B1,JUN |
| rhein | PGR,NCOA2,PTGS1,PTGS2,KCNH2,CHRM3,CHRM1,SCN5A,CHRM4 |
| beta-sitosterol | ADRA1A,CHRM2,ADRA1B,ADRB2,CHRNA2,SLC6A4,OPRM1,GABRA1BCL2,BAX,CASP9,JUN,CASP3,CASP8,PRKCA,  PON1,MAP2 |
| (+)-catechin | IL1,RB1,TNFSF15,JUN,IL6,CASP3,TP63 |
| luteolin | NFKBIA,TOP1,MDM2,APP,MMP1,PCNA,ERBB2,PPARG,  HMOX1,BCL2，CASP7,ICAM1,MCL1,BIRC5,IL2,CCNB1,TYR,  IFNG,IL4,TOP2A,GSTP1,SLC2A4,INSR,CD4,LG,PTGES,  NUF2,ADCY2,MET,PTGS1,AR,PPARG，PTGS2,NCOA2,  AKR1B1,PRSS1,KCNH2,SCN5A,ADRB2,MMP3,F7  RXRA,ACHE,GABRA1,MAOB,RELA,EGFR,AKT1,VEGFA,  CCND1，BCL2L1 |
| quercetin | FOS,CDKN1A,EIF6,BAX,CASP8,PLAU,MMP2,MMP9,MAPK1,IL1,EGFRB1,TNFSF15,JUN,IL6,AHSA1,CASP3,TP63,ELK1,  NFKBIA,POR,ODC1CASP9,TOP1,RAF1,SOD1,PRKCA,MMP1,HIF1A,STAT1,RUNX1T1,ERBB2,PPARG,ACACA,HMOX1,  CYP3A4,CYP1A2,CAV1,MYC,F3,GJA1,CYP1A1,ICAM1,IL1B,  CCL2,SELE,VCAM1,PTGER3,CXCL8，PRKCB,BIRC5,DUOX2,  NOS3,HSPB1,SULT1E1,MGAM,IL2,NR1I2,CYP1B1,CCNB1  ,PLAT,THBD,SERPINE1,COL1A1,IFNG,ALOX5,IL1A  MPO,TOP2A,NCF1,ABCG2,HAS2,GSTP1,NFE2L2,NQO1,  PARP1,AHR，PSMD3,SLC2A4,COL3A1,CXCL11,CXCL2,  DCAF5,NR1I3,CHEK2,INSRCLDN4,PPARA,PPARD,HSF1,CRP,  CXCL1,,CHUK,SPP1,RUNX2,RASSF1,E2F1,E2F2,ACPP,  CTSD,IGFBP3,IGF2,CD4,LG,IRF1,ERBB3，PON1,DIO1,  PCOLCE,NPEPPS,HK2,RASA1,GSTM1,GSTM2,PTGS2  PLB1,PTGS1,PTGS2,MAOB,NCOA2,RELA,STAT3,AKT1,  VEGFA,CCND1,BCL2,BCL2L1,FOS,CDKN1A,EIF6,BAX,  CASP9,PLAU,MMP2,MMP9,MAPK3,MAPK1,IL1,,TNFSF15 |
| resveratrol | PTGS1,PTGS2,MAOB,NCOA2,RELA,STAT3,AKT1,VEGFA,  CCND1,BCL2,BCL2L1,FOS,CDKN1A,EIF6,BAX,CASP9,PLAU,MMP2,MMP9,MAPK3,MAPK1,IL10,TNFSF15JUN,IL6,AHSA1,CASP3,TP63,MAPK8,NFKBIA,ODC1,BAK1,BBC3,SOD1,  BRCA2,AAGAB,PRKD1,TGFA,CD32,SPARC,CAT,PRKCA,  TEP1,HIF1A,IGF1R,STAT1,RUNX1T1,EDN3FOXO1,PPARG,  CTNNB1,MYC,F3,GJA1,CYP1A1,ICAM1,IL1B,CCL2  SELE,VCAM1,PRKCD,CXCL8,MCL1,BRCA1,XRCC6,SOD2,  PRKCB,PECAM1,BIRC5,DUOX2,NOS3,PTPN1,CCND2,  BCL2A1,ABCB1,HGF,SULT1E1,MGAM,CYP1B1,CCNB1,  DDIT3,PLAT,IL1A,MPO,TNFRSF1BABCG2,NFE2L2,NQO1,  AHR,PRKAG2,SLC2A4,PPARA,CRP,PON1,CD8CCNE1,CCNE2,BCAM,CREBZF,NTRK1,KLF1,APAF1,ABCC3,SREBF1,  ADIPOR1,ADIPOR2,JAK1,AGTR1,IRS1,CFLAR,LGSN,PYGO1,IL17B,MTOR,CCR2,EIF2S1,PTGES,PMAIP1,BCL2L11,  TNFSF1,TNFRSF1A,RPS6,GCH1,BIRC3,TRAF2,CDC42,BSG,  COL2A1,ITGB1,CD28,NR1H3,PAPPA |

Table S2 PI3K-Akt signaling pathway enriched 42 targets.

| Pathway | GeneRatio | | p.adjust | Targets |
| --- | --- | --- | --- | --- |
| PI3K-Akt signaling pathway | 42/179 | 1.66×10–18 | | GSK3B/CHRM1/CHRM2/BCL2/CASP9/  PRKCA/RELA/EGFR/AKT1/VEGFA/CCND1/BCL2L1/CDKN1A/MAPK1/IL6/MDM2/  ERBB2/MCL1/IL2/IL4/TGFA/INSR/EGF/  RAF1/MYC/NOS3/COL1A1/CHUK/SPP1  /ERBB3/MAPK3/IGF1R/CCND2/HGF/  NTRK1/JAK1/IRS1/MTOR/BCL2L11/RPS6  /COL2A1/ITGB1 |

Figure S1. The effects of quercetin on ASM cells proliferation and AKT/ mTOR pathway activation. (A, B) ASM cells were treated with PDGF (10 ng/ml) and quercetin ( 50 μM, 100 μM) at different concentrations alone or in combination for 24h and 48h. Cell proliferation was detected by CCK-8. The data were expressed as mean ± SD (n=8) of each group, * P<0.05 and ** P<0.01 vs PDGF group, #P<0.01vs DMSO group (control group). (C-E) ASM cells were treated with PDGF (10 ng/ml) and quercetin ( 50 μM, 100 μM) for 5h, respectively. The expression levels of p-AKT and p-mTOR were analyzed by western blotting. The relative protein levels of P-AKT and P-mTOR were calculated by Image J and expressed as mean ± SD (n=3) of each group. ns P>0.05 vs PDGF group, * P<0.05 and ** P<0.01 vs PDGF group, #P<0.01vs DMSO group (control group).


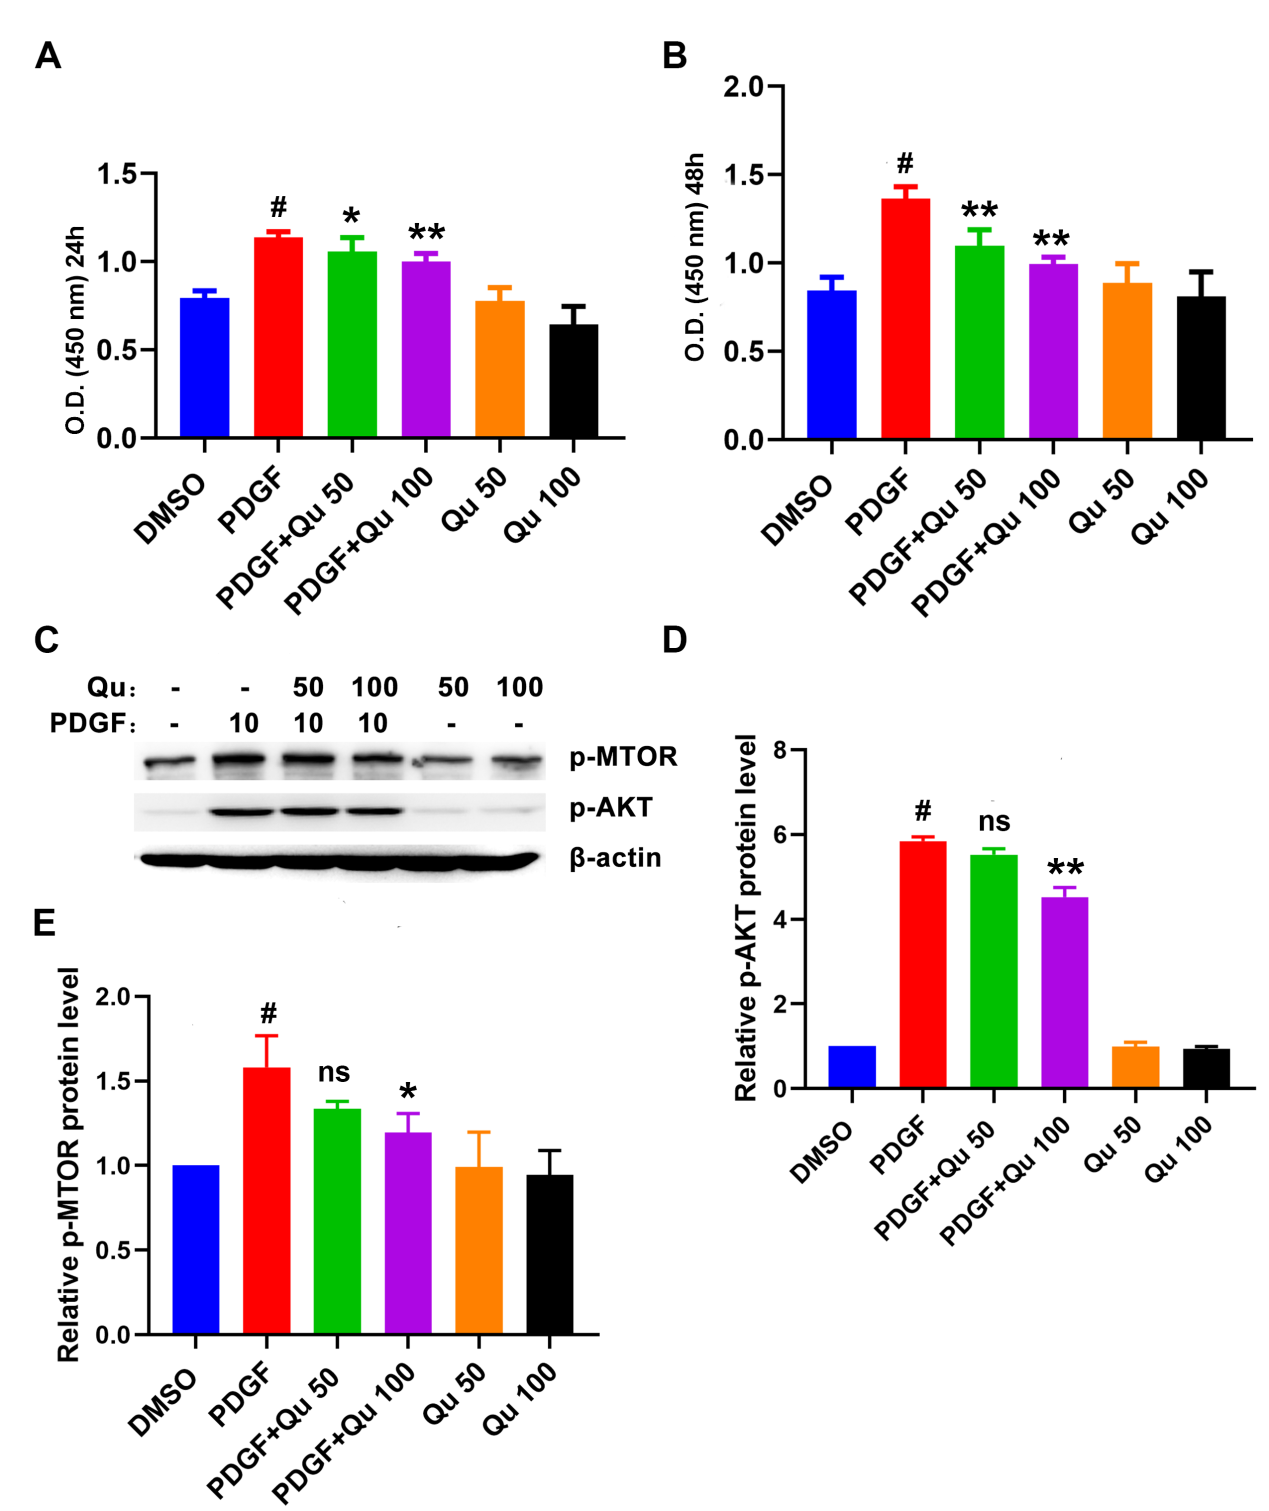


Figure S2. The effects of different ingredients on the proliferation of ASM cells. (A) ASM cells were treated with PDGF (10 ng/ml) and Polydatin (50 μM,100 μM) alone or in combination for 24h. The data were expressed as mean ± SD (n = 8) of each group. (B) ASM cells were treated with PDGF (10 ng/ml) and rhein and catechin (12.5 μM) alone or in combination for 24h. Cell proliferation was detected by CCK-8. The data were expressed as mean ± SD (n = 6) of each group, ns P>0.05 vs PDGF group, ** P<0.01 vs PDGF group, #P<0.01 vs DMSO group (control group).


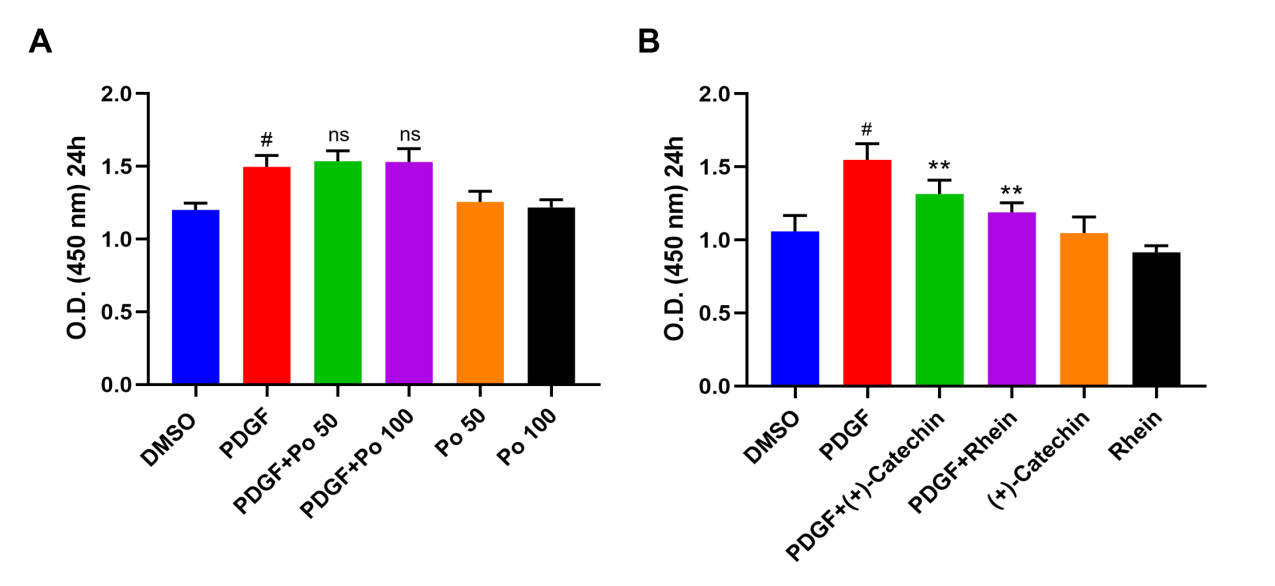

Supplement: Supplementary file 1 [file get_supplementary_file.php]
